# Supplementary material
Source: PubMed Central journal article supplement (PMC2862438)
Supplement: pp.110.154765_2.pdf [file pp.110.154765_2.pdf]

**Supplementary Table 1. Monosaccharide - H<sup>+</sup> symporter (STP subfamily) genes identified in the grapevine (*V. vinifera* PN40024) genome**

| Gene model in PN40024 <sup>a</sup> | Genbank Accession No. | Chromosomal position <sup>b</sup> | Predicted size (aa) | Unigene <sup>c</sup> | Existing protein designation | Closest At ortholog <sup>e</sup> | Reference             |
|------------------------------------|-----------------------|-----------------------------------|---------------------|----------------------|------------------------------|----------------------------------|-----------------------|
| GSVIVT00019953001                  | CAO71140              | Chr 5: 4743399..4745342           | 506                 | nd <sup>d</sup>      |                              | AtSTP8                           |                       |
| GSVIVT00019956001                  | CAO71143              | Chr 5: 4760129..4764785           | 536                 | Vvi.19516            | VvHT5                        | AtSTP13                          | Hayes et al. (2007)   |
| GSVIVT00025290001                  | CAO23210              | Chr 9: 13726649..13730943         | 506                 | Vvi.11106            |                              | AtSTP8                           |                       |
| GSVIVT00016689001                  | CAO65473              | Chr 11: 2726206..2730777          | 512                 | Vvi.15807            |                              | AtSTP14                          |                       |
| GSVIVT00028620001                  | CAO40702              | Chr 13: 12399601..12403892        | 506                 | Vvi.11106            |                              | AtSTP8                           |                       |
| GSVIVT00028621001                  | CAO40703              | Chr 13: 12410608..12414899        | 506                 | Vvi.11106            |                              | AtSTP8                           |                       |
| GSVIVT00028622001                  | CAO40704              | Chr 13: 12420187..12424485        | 506                 | Vvi.11106            |                              | AtSTP8                           |                       |
| GSVIVT00028624001                  | CAO40706              | Chr 13: 12432712..12437002        | 506                 | Vvi.11106            |                              | AtSTP8                           |                       |
| GSVIVT00028634001                  | CAO40711              | Chr 13: 12501264..12505555        | 506                 | Vvi.11106            |                              | AtSTP8                           |                       |
| GSVIVT00038185001                  | CAO49296              | Chr 14: 11119521..11123575        | 522                 | nd                   |                              | AtSTP1                           |                       |
| GSVIVT00038183001                  | CAO49294              | Chr 14: 11127164..11131194        | 522                 | nd                   |                              | AtSTP1                           |                       |
| GSVIVT00038182001                  | CAO49293              | Chr 14: 11135188..11140051        | 535                 | nd                   |                              | AtSTP12                          |                       |
| GSVIVT00015239001                  | CAO61725              | Chr 18: 4309655..4315053          | 500                 | Vvi.550              | VvHT2                        | AtSTP5                           | Fillion et al. (1999) |
| GSVIVT00004559001                  | CAO46500              | Chr Un: 97904733..97908812        | 519                 | Vvi.3078             | VvHT1                        | AtSTP1                           | Fillion et al. (1999) |
| GSVIVT00005628001                  | CAO61725              | Chr Un: 33664550..33671757        | 526                 | Vvi.6125             | VvHT3                        | AtSTP7                           | Hayes et al. (2007)   |
| GSVIVT00030854001                  | CAO60846              | Chr Un: 113350741..113357412      | 508                 | nd                   | VvHT4                        | AtSTP3                           | Hayes et al. (2007)   |

<sup>a</sup> <http://www.genoscope.cns.fr/Vitis>

<sup>b</sup> 8.4X assembly at <http://www.genoscope.cns.fr/Vitis>

<sup>c</sup> <http://www.ncbi.nlm.nih.gov/sites/entrez?db=unigene>

<sup>d</sup> no matching EST sequences available

<sup>e</sup> Closest Arabidopsis thaliana (At) homolog ortholog identified using BLASTp search
