# Supplementary material
Source: PubMed Central journal article supplement (PMC2862438)
Supplement: pp.110.154765_3.pdf [file pp.110.154765_3.pdf]

**Supplementary Table 2: Oligonucleotide primers used in this study**

| <b>Oligo name</b> | <b>Oligo Sequence 5`-3`</b>          |
|-------------------|--------------------------------------|
| ActinF            | GCATCCCTCAGCACCTTCCA                 |
| ActinR            | AACCCACCTGAACACATCTCC                |
| cwINVF            | ATGAATCATCTAGYGTGGAGCAC              |
| cwINVR            | CTTAAACGATATCTCCACATCTGC             |
| GIN1F             | CCATCTCCATCCCATCGTAACC               |
| GIN1R             | GGCTATCCAAGTTTCCAACCAACC             |
| HT1F              | TCGGAGTGGATGGAGAACCTTG               |
| HT1R              | GACATCACCACCACAAAGAAGGC              |
| HT2F              | GTTGCCGTCAACTTCGCAAC                 |
| HT2R              | GAAGGAATTTAGCTATGGCAGAG              |
| HT3F              | TAATCGAACGGGGATCAAG                  |
| HT3R              | CCCCCAGAAATCAATAAAACTC               |
| HT4F              | CTGATGTTGCAGCGTGTC                   |
| HT4R              | GGAGGCCATACCAACTACG                  |
| HT5F              | GTCGCTTGAAGAAGGAAAG                  |
| HT5R              | CCTACTTTGTCGACAGAGTAGACG             |
| NCED1F            | TGCAGAGGACGAGAGTGTA                  |
| NCED1R            | AGCTAGACCAAAAGCTACGA                 |
| ZepF              | GGTAAGAAGGAAAGGTTGC                  |
| ZepR              | CAATAGGAGTCCCTGATTTGATGC             |
| HT5-2k            | CAGAAGCTTGTGAAAATTAGATTGATAAATTAGGAT |
| HT5-1k            | ACGAAGCTTGTCCATAATTTTGTGATTGG        |
| HT5-R             | GCTCCATGGTGTCAACCACCTACAACTCC        |
| HTDEGF1           | TCCACTGTACCTGTCCGARATGGCNCC          |
| HTDEGR1           | TCCCAGTGGTCCCCANSWCCA                |

Mixed base codes: R(AG) S(GC) W(AT) N(AGCT).

Underlined sequences indicates position of added restriction sites
