# Supplementary material
Source: PubMed Central journal article supplement (PMC2862438)

Supplementary Fig. S1 Hayes et al

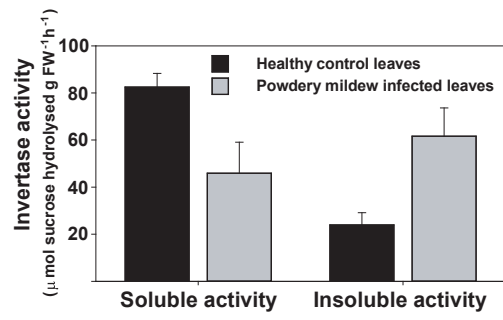

Supplement: pp.110.154765_1.pdf [file pp.110.154765_1.pdf]
